# Supplementary material
Source: MDPI journal article supplement (https://www.mdpi.com/2311-7524/8/3/199)
Supplement: s1 [file s1]

**Table S1.** Parameters of Pearson  $\chi^2$  test used for all analysed apricot cultivars.

| Parameter                  | $\chi^2$ | df | p       |
|----------------------------|----------|----|---------|
| Weight of fruit (g)        | 1.981    | 2  | 0.37130 |
| Size of flesh (mm)         | 1.015    | 1  | 0.31362 |
| Weight of stone (g)        | 4.125    | 2  | 0.12715 |
| Soluble solids content (%) | 8.396    | 1  | 0.00376 |
| Relative genome size (pg)  | 5.302    | 1  | 0.02130 |

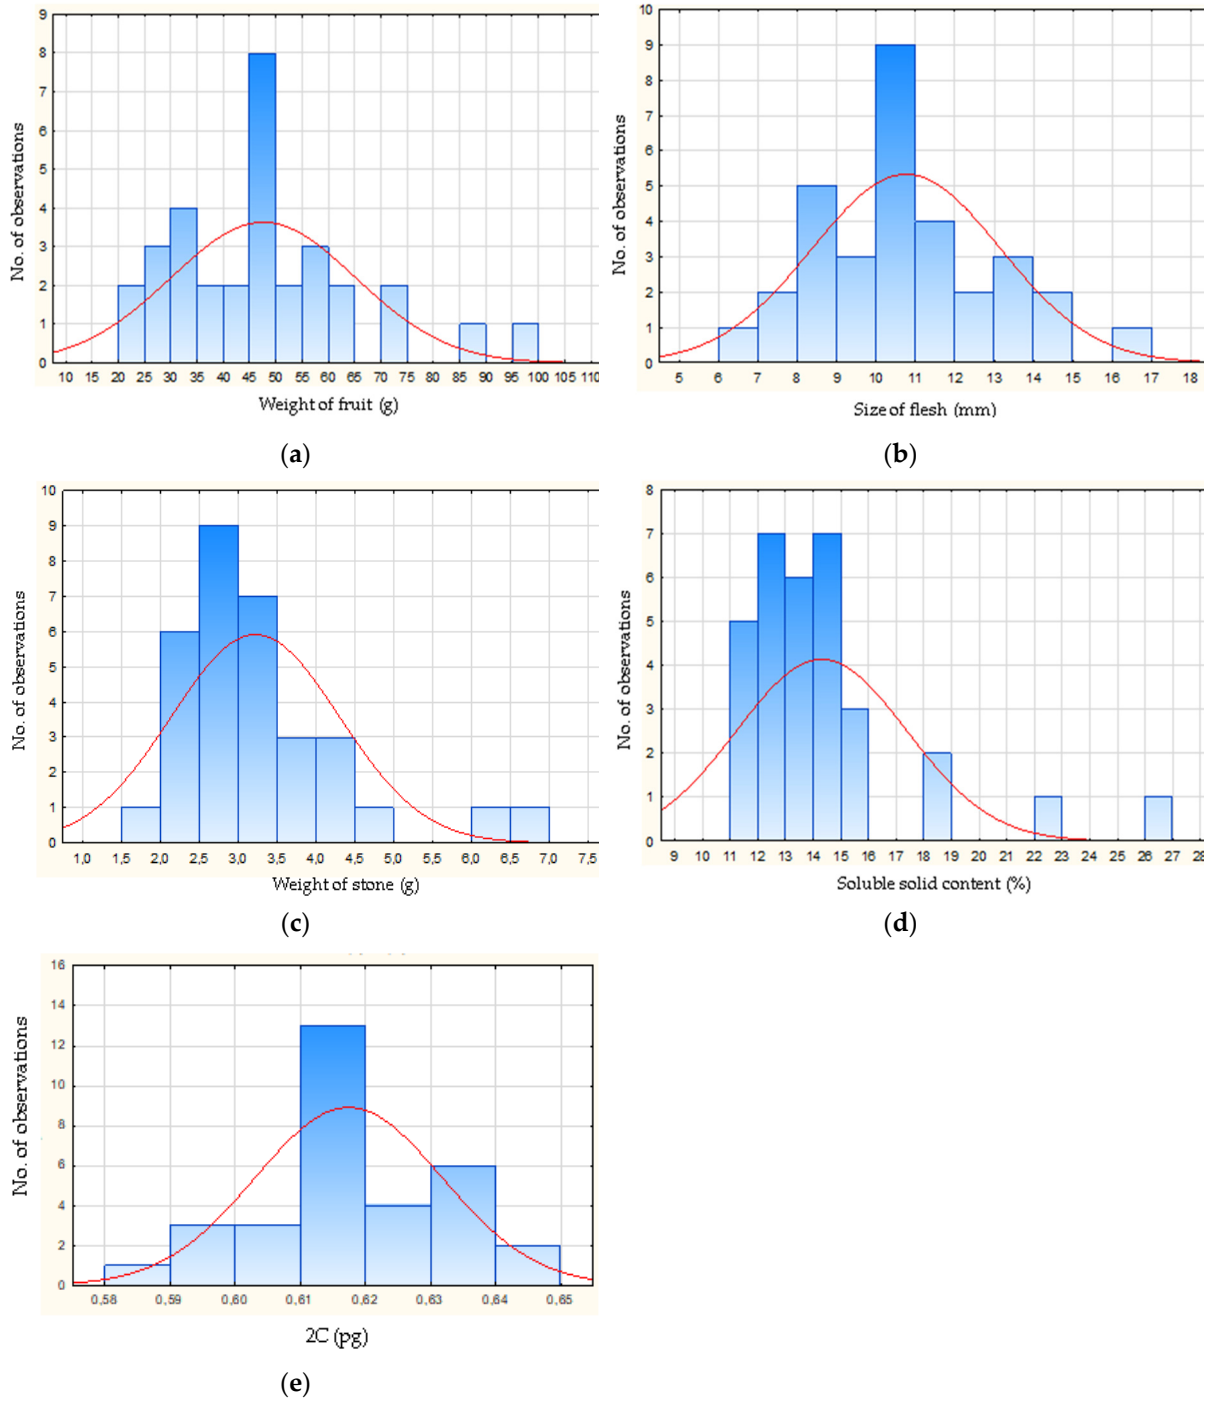

**Figure S1.** Fitting of continuous normal distribution of (a) weight of fruit, (b) size of flesh, (c) weight of stone, (d) soluble solid content, (e) relative genome size of all analysed apricot cultivars.

**Table S2.** Parameters of Pearson  $\chi^2$  test used for weight of fruit and relative genome size of geographical groups of apricot cultivars (n indicates number of cultivars).

| Parameter                 |               | n | $\chi^2$ | df | p       |
|---------------------------|---------------|---|----------|----|---------|
| Weight of fruit (g)       | American      | 8 | 12.948   | 8  | 0.11366 |
|                           | European      | 7 | 16.866   | 15 | 0.32693 |
|                           | Turkish       | 6 | 17.799   | 11 | 0.08635 |
|                           | Central Asian | 6 | 16.350   | 10 | 0.09003 |
|                           | East Asian    | 5 | 15.612   | 10 | 0.11128 |
| Relative genome size (pg) | American      | 8 | 8.681    | 9  | 0.46721 |
|                           | European      | 7 | 17.285   | 18 | 0.50362 |
|                           | Turkish       | 6 | 16.214   | 14 | 0.30046 |
|                           | Central Asian | 6 | 14.249   | 10 | 0.16194 |
|                           | East Asian    | 5 | 27.819   | 15 | 0.02273 |
